# Supplementary material for: Phenotypic and Genomic Difference among Four Botryosphaeria Pathogens in Chinese Hickory Trunk Canker
Source: MDPI journal article supplement (doi:10.3390/jof9020204), 2023-02-04
Supplement: s1 [file s1]

**Supplementary Table S3** Specific candidate primers for *B. dothidea* molecular identification based on species-specific genes.

| Number | Gene           | Gene_Length(bp) | Primer     |                              | Product size(bp) |
|--------|----------------|-----------------|------------|------------------------------|------------------|
| 1      | <i>jg10975</i> | 942             | Sense      | 5' TCTGGTGCTCCACATCGC 3'     | 650              |
|        |                |                 | Anti-sense | 5' CGCATAGTCATCGCCCTC 3'     |                  |
| 3      | <i>jg10954</i> | 1425            | Sense      | 5' CGATGAGGTGAGCGATGC 3'     | 580              |
|        |                |                 | Anti-sense | 5' CGCGATGTGCGTTATGGA 3'     |                  |
| 4      | <i>jg10969</i> | 955             | Sense      | 5' GACGCCCCGATCTTTCTCA 3'    | 689              |
|        |                |                 | Anti-sense | 5' GCTGGTCGTTGCCTCTGT 3'     |                  |
| 6      | <i>jg1156</i>  | 938             | Sense      | 5' ATTCCGCAACCCCACTTC 3'     | 784              |
|        |                |                 | Anti-sense | 5' TCCCCACAACACTACTGTCTGA 3' |                  |
| 7      | <i>jg1162</i>  | 754             | Sense      | 5' GGCAGAGGTGGGTTTGAG 3'     | 572              |
|        |                |                 | Anti-sense | 5' AGGGTGCGGATGCGATAT 3'     |                  |
| 8      | <i>jg10944</i> | 1077            | Sense      | 5' CTCACCTTCCACATCAACCC 3'   | 667              |
|        |                |                 | Anti-sense | 5' ACCGGCGCAGGCTCCTCTT 3'    |                  |
| 9      | <i>jg10962</i> | 915             | Sense      | 5' ACAACACCATCGCTCCCG 3'     | 665              |
|        |                |                 | Anti-sense | 5' TTCGCACATATCACCTCCA 3'    |                  |
| 10     | <i>jg11</i>    | 921             | Sense      | 5' TCCAACGACGAGCAATCC 3'     | 695              |
|        |                |                 | Anti-sense | 5' TGTGCCCTGAGGCGGTAT 3'     |                  |
